# Supplementary material
Source: PubMed Central journal article supplement (PMC2275881)
Supplement: rspb20070673s05.pdf [file rspb20070673s05.pdf]

# Electronic supplementary material: Probabilistic participation in public goods games

Tatsuya Sasaki      Isamu Okada      Tatsuo Unemi

July 19, 2007

## A Payoff Difference

Based on the previous results of voluntary PGGs (Hauert *et al.*, 2002), we calculate the advantage of a potential defector over a potential cooperator.

The variables  $x_p := p_x \tilde{x}$ ,  $y_p := p_y(1 - \tilde{x})$  and  $z$  correspond to the relative frequencies of the three pure strategies of voluntary PGGs. According to Hauert *et al.* (2002), the average payoffs  $P_c$  and  $P_d$  of a cooperator and a defector are respectively given by

$$P_c = \sigma z^{N-1} + (r-1)(1-z^{N-1}) - r \frac{y_p}{1-z} \left( 1 - \frac{1-z^N}{N(1-z)} \right), \quad (\text{A.1})$$

$$P_d = \sigma z^{N-1} + r \frac{x_p}{1-z} \left( 1 - \frac{1-z^N}{N(1-z)} \right), \quad (\text{A.2})$$

where  $\sigma$  is a fixed payoff of loner-like behaviour.

Using  $P_c$  and  $P_d$ , the expected payoffs  $P_{\bar{c}}$  and  $P_{\bar{d}}$  are given by

$$P_{\bar{c}} = p_x P_c + (1-p_x)\sigma, \quad (\text{A.3})$$

$$P_{\bar{d}} = p_y P_d + (1-p_y)\sigma. \quad (\text{A.4})$$

Hence, estimating the advantage of a potential defector over a potential cooperator yields

$$\begin{aligned} & (1-z)(P_{\bar{d}} - P_{\bar{c}}) \\ &= \sigma(p_x - p_y)(1-z) + (x_p + y_p)(p_y P_d - p_x P_c) \\ &= \sigma(p_x - p_y)(1-z) - (p_x - p_y)(x_p P_c + y_p P_d) + p_x p_y (P_d - P_c) \\ &= (p_x - p_y)(\sigma - (x_p P_c + y_p P_d + z\sigma)) + p_x p_y (P_d - P_c) \\ &= (p_x - p_y)(\sigma - \bar{P}) + p_x p_y (P_d - P_c), \end{aligned} \quad (\text{A.5})$$

where we use  $x_p + y_p + z = 1$  and  $\bar{P} = x_p P_c + y_p P_d + z\sigma$ . When  $z$  is fixed, this eqn (A.5) enables us to compare the dynamics of the current model with that of voluntary PGGs. In particular, for  $p_x = p_y$ ,  $z$  is constant ( $1 - p_x = z = 1 - p_y$ ) and eqn (A.5) is then reduced to

$$P_{\bar{d}} - P_{\bar{c}} = (1 - z)(P_d - P_c). \quad (\text{A.6})$$

Further, substituting eqns (A.1) and (A.2) for  $P_{\bar{d}} - P_{\bar{c}}$ , leads to the advantage function:

$$\begin{aligned} & P_{\bar{d}} - P_{\bar{c}} \\ &= \sigma(p_x - p_y) + (p_y P_d - p_x P_c) \\ &= \sigma(p_x - p_y) + \sigma(p_x - p_y)z^{N-1} - (r-1)p_x(1 - z^{N-1}) \\ &\quad + \frac{r}{1-z}(p_y x_p + p_x y_p) \left(1 - \frac{1 - z^N}{N(1-z)}\right) \\ &= (\sigma(p_x - p_y) - (r-1)p_x)(1 - z^{N-1}) + r \frac{p_x p_y}{1-z} \left(1 - \frac{1 - z^N}{N(1-z)}\right) \\ &=: \tilde{F}(z(\tilde{x})), \end{aligned}$$

where we use  $p_y x_p + p_x y_p = p_y p_x \tilde{x} + p_x p_y (1 - \tilde{x}) = p_x p_y$ .

We introduce some notations,  $a := (\sigma - r + 1)p_x - \sigma p_y$  and  $b := r p_x p_y$ . Then the derivative of  $\tilde{F}$  with respect to  $z$  is given by

$$\begin{aligned} \frac{d\tilde{F}}{dz} &= \frac{d}{dz} \left( -a z^{N-1} + \frac{b}{N} \sum_{k=0}^{N-2} (N-1-k) z^k \right) \\ &= -a(N-1)z^{N-2} + \frac{b}{N} \sum_{k=1}^{N-2} (N-1-k) k z^{k-1} \quad (N \geq 3), \end{aligned}$$

and  $\tilde{F}'(z) = -a$  ( $N = 2$ ). In the parameter space  $(p_x, p_y)$ , it is always the case that  $a \leq 0$  and  $b \geq 0$ . In particular,  $a = 0 \wedge b = 0 \Leftrightarrow (p_x, p_y) = (0, 0)$ . Therefore, we have  $d\tilde{F}/dz \geq 0$  ( $d\tilde{F}/dz = 0 \Leftrightarrow (p_x, p_y) = (0, 0)$ ) and

$$\frac{d\tilde{F}}{d\tilde{x}} = \frac{d\tilde{F}}{dz} \frac{dz}{d\tilde{x}} \begin{cases} > 0 & (p_x < p_y) \\ = 0 & (p_x = p_y) \\ < 0 & (p_x > p_y), \end{cases}$$

where  $dz/d\tilde{x} = p_y - p_x$ .

## B Arrangement of Dynamical Regimes

We separate the parameter space  $(p_x, p_y)$  depending on whether the signs of  $\tilde{F}(z(\tilde{x}))$  at each  $\tilde{x} = 0, 1$  are the same. Consequently we obtain the following four regions:

- (i)  $\{\tilde{F}(z(0)) \geq 0\} \cap \{\tilde{F}(z(1)) \geq 0\}$
- (ii)  $\{\tilde{F}(z(0)) < 0\} \cap \{\tilde{F}(z(1)) > 0\}$
- (iii)  $\{\tilde{F}(z(0)) \leq 0\} \cap \{\tilde{F}(z(1)) \leq 0\}$
- (iv)  $\{\tilde{F}(z(0)) > 0\} \cap \{\tilde{F}(z(1)) < 0\}$ ,

where  $z(0) = 1 - p_y$  and  $z(1) = 1 - p_x$ . Monotonically increasing  $\tilde{F}(z(\tilde{x})) \Leftrightarrow p_x < p_y$  yields that  $p_x < p_y$  holds in the region (ii). Likewise, monotonically decreasing  $\tilde{F}(z(\tilde{x})) \Leftrightarrow p_x > p_y$  yields that  $p_x > p_y$  holds in the region (iv).

On the diagonal  $p_x = p_y$ ,  $\tilde{F}(z)$  is equal to  $(1-z)F(z)$  (eqns (A.6)). According to Hauert *et al.* (2002),  $F(0) > 0$  and  $F(1) = 0$  hold. Then, if  $F(z)$  has a unique interior root  $\hat{z}$  in  $(0, 1)$  ( $r > 2$ ),  $F(z) > 0$  for  $0 < z < \hat{z}$  and  $F(z) < 0$  for  $\hat{z} < z < 1$ . If  $F(z)$  has no root  $\hat{z}$  there ( $r \leq 2$ ),  $F(z) > 0$  for all  $0 < z < 1$ . Let  $\mathbf{Q}$  be the point  $(1 - \hat{z}, 1 - \hat{z})$  in  $(p_x, p_y)$ . The properties of  $F(z)$  lead to that for  $r > 2$ , at the point  $\mathbf{Q}$  the diagonal  $p_x = p_y$  is divided into the two segment covered by (i) and (iii), and for  $r \leq 2$ , the diagonal is included in (i). We specifically denote the two points set  $\{(0, 0), \mathbf{Q}\}$  as (v) and exclude this from (i) and (iii).

By using  $F(z)$ , we obtain

$$\begin{aligned}\tilde{F}(z(0)) &= \sigma(p_x - p_y)(1 - (1 - p_y)^{N-1}) + p_x F(1 - p_y), \\ \tilde{F}(z(1)) &= (\sigma - r + 1)(p_x - p_y)(1 - (1 - p_x)^{N-1}) + p_y F(1 - p_x).\end{aligned}$$

Let  $\mathbf{C}_1$  and  $\mathbf{C}_2$  be the boundary curves of the four regions (i–iv), defined by  $g_1(p_x, p_y) := \tilde{F}(z(1)) = 0$  and  $g_2(p_x, p_y) := \tilde{F}(z(0)) = 0$ , respectively. The monotonicity of  $\tilde{F}(z(\tilde{x}))$  yields that if  $\tilde{F}(z(0)) = \tilde{F}(z(1))$ ,  $z(0) = z(1)$  ( $p_x = p_y$ ) holds. Hence, the intersection of  $\mathbf{C}_1$  and  $\mathbf{C}_2$  exists on the diagonal. Since  $g_1(1 - z, 1 - z) = g_2(1 - z, 1 - z) = F(z)$ , The intersection consists of the single point  $(0, 0)$  for  $r \leq 2$  or the two points:  $(0, 0)$  and  $\mathbf{Q}$  for  $r > 2$ .

In order to investigate the arrangement of the regions in the vicinity of  $\mathbf{Q}$ , we

compute the Jacobian of  $(g_1, g_2)$  at  $\mathbf{Q}$  as follows:

$$\begin{aligned} \frac{\partial(g_1, g_2)}{\partial(p_x, p_y)} \Big|_{\mathbf{Q}} &= \begin{vmatrix} \frac{\partial g_1}{\partial p_x} & \frac{\partial g_1}{\partial p_y} \\ \frac{\partial g_2}{\partial p_x} & \frac{\partial g_2}{\partial p_y} \end{vmatrix} \Big|_{\mathbf{Q}} \\ &= \begin{vmatrix} (\sigma - r + 1)(1 - \hat{z}^N) - (1 - \hat{z})F'(\hat{z}) & -(\sigma - r + 1)(1 - \hat{z}^N) \\ \sigma(1 - \hat{z}^N) & -\sigma(1 - \hat{z}^N) - (1 - \hat{z})F'(\hat{z}) \end{vmatrix} \\ &= (1 - \hat{z})F'(\hat{z})\{(1 - \hat{z})F'(\hat{z}) + (r - 1)(1 - \hat{z}^N)\} \\ &= (1 - \hat{z})F'(\hat{z})\{(r - 1)(N - 1)(1 - \hat{z})\hat{z}^{N-2} + (r - 2)(1 - \hat{z}^{N-1})\}. \end{aligned}$$

Because  $0 < \hat{z} < 1$ ,  $F'(\hat{z}) < 0$  (Hauert *et al.*, 2002),  $r > 2$  and  $N \geq 3$ , the Jacobian is nonzero. Therefore,  $\mathbf{C}_1$  and  $\mathbf{C}_2$  are transversely crossing at  $\mathbf{Q}$ , and the four regions (i–iv) exist in any small neighborhood of  $\mathbf{Q}$ .

## C Average Payoff at Equilibrium

We here calculate the average population payoff in each moment at each type of equilibria of this model. Let  $\bar{P}_z$  be the average population payoff at a point  $z$ .

Firstly, we consider the case of interior equilibrium, that is, the region (ii) and (iv), and denote the unique interior fixed point as  $\tilde{z}$ . We then suppose the case of  $r > 2$  ( $\mathbf{Q}$  exists). Considering a sufficient small neighborhood of  $\mathbf{Q}$ , allows us to assume that the range of  $z$  contains the unique root  $\hat{z}$  of  $F(z)$ .

Using eqn (A.5):

$$(1 - z)\tilde{F}(z) = (p_x - p_y)(\sigma - \bar{P}_z) + p_x p_y F(z) \quad (\text{C.1})$$

leads to

$$\tilde{F}(\hat{z}) = 0 \Leftrightarrow \tilde{z} = \hat{z} \Leftrightarrow \bar{P}_z = \sigma.$$

Since the signs of  $F(z)$  and  $\tilde{F}(z)$  change once from (+) to (−) and from (−) to (+) in the open interval (0, 1) respectively, we obtain

$$\tilde{F}(\hat{z}) > 0 \Leftrightarrow \tilde{z} < \hat{z} \Leftrightarrow F(\tilde{z}) > 0.$$

For the region (ii) ( $p_x < p_y$ ), using  $\tilde{F}(\tilde{z}) = 0$  in eqn (C.1), we obtain  $F(\tilde{z}) > 0 \Leftrightarrow \bar{P}_z < \sigma$ , that is,

$$\tilde{F}(\hat{z}) < 0 \Leftrightarrow \bar{P}_z > \sigma.$$

Likewise, for the region (iv) ( $p_x > p_y$ ),  $\tilde{F}(\hat{z}) > 0 \Leftrightarrow \bar{P}_z > \sigma$  holds. Let  $\mathbf{C}_3$  be the curve  $\tilde{F}(\hat{z}) = 0$ . The above results can be summarized by stating that  $\mathbf{C}_3$  divides

each of the region (ii) and (iv) into two subregions which are characterized by  $\bar{P}_z > \sigma$  and  $\bar{P}_z < \sigma$ , in the vicinity of  $\mathbf{Q}$ .  $\bar{P}_z$  is then equal to  $\sigma$  on  $\mathbf{C}_3$ .

Conversely, if  $r \leq 2$  ( $\mathbf{Q}$  does not exist),  $F(z) > 0$  always holds in  $(0, 1)$ . Using eqn (C.1) yields that  $p_x < p_y$  in (ii)  $\Rightarrow \bar{P}_z < \sigma$ , and  $p_x > p_y$  in (iv)  $\Rightarrow \bar{P}_z > \sigma$ . Other two subregions:  $\bar{P}^* > \sigma$  in (ii) and  $\bar{P}^* < \sigma$  in (iv), do not appear. We then notice that  $N = 2 \Rightarrow r \leq 2$  because of the precondition of the public goods game:  $1 < r < N$ .

Secondly, we remark the case of trivial equilibrium, that is, both  $\tilde{\mathbf{C}}$ - and  $\tilde{\mathbf{D}}$ -homogeneous states. In the former, substituting  $y_p = 0$  ( $\tilde{x} = 1$ ) for eqn (A.1) yields  $P_{\tilde{\mathbf{C}}} = \sigma z^{N-1} + (r-1)(1-z^{N-1})$ . Thus, since  $p_x = 1-z$  and  $\sigma < r-1$  (the precondition of PGG with loners), eqn (A.3) yields

$$\begin{aligned} P_{\tilde{\mathbf{C}}} &= (\sigma - r + 1)\{z + (1-z)z^{N-1}\} + (r-1) \\ &\geq (\sigma - r + 1) \cdot 1 + (r-1) \\ &= \sigma, \end{aligned}$$

where  $P_{\tilde{\mathbf{C}}} = \sigma \Leftrightarrow p_x = 0$  which means that all of the population are actually pure loners. In the latter, likewise, substituting  $x_p = 0$  ( $\tilde{x} = 0$ ) for eqn (A.2) yields  $P_{\tilde{\mathbf{D}}} = \sigma z^{N-1}$ . Thus, since  $p_y = 1-z$ , eqn (A.4) yields

$$P_{\tilde{\mathbf{D}}} = \sigma\{z + (1-z)z^{N-1}\} \leq \sigma,$$

where  $P_{\tilde{\mathbf{D}}} = \sigma \Leftrightarrow p_y = 0$ .

## References

- [1] Hauert, C., De Monte, S., Hofbauer, J. and Sigmund, K. 2002 Replicator dynamics for optional public goods games. *J. Theor. Biol.* **218**, 187–194. (DOI: 10.1006/jtbi.2002.3067)
